# Supplementary material for: Synthesis of Novel VO(II)-Perimidine Complexes: Spectral, Computational, and Antitumor Studies
Source: Hindawi journal article supplement (doi:10.1155/2018/7176040), 2018-09-06
Supplement: f1 [file 7176040.f1.pdf]

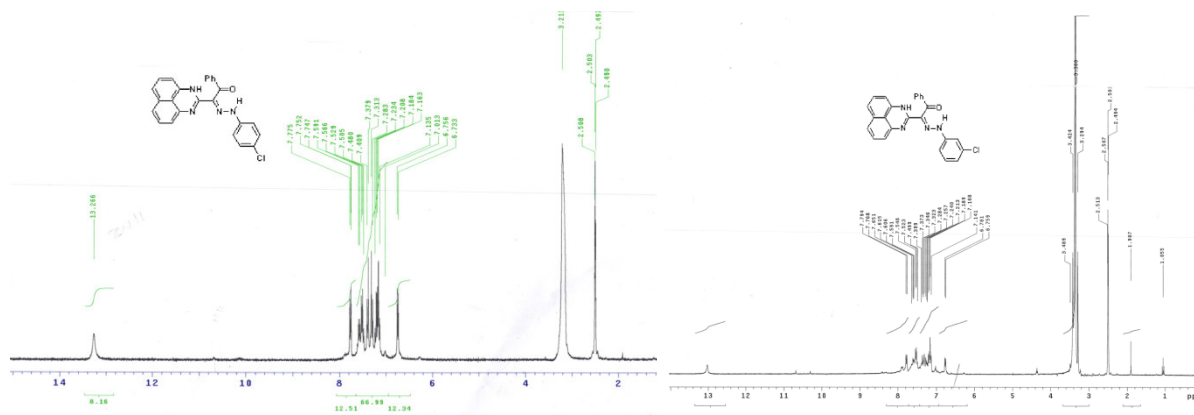

Fig. 1S .  $^1\text{H NMR}$  spectra of LCIP and LCIM perimidine ligands

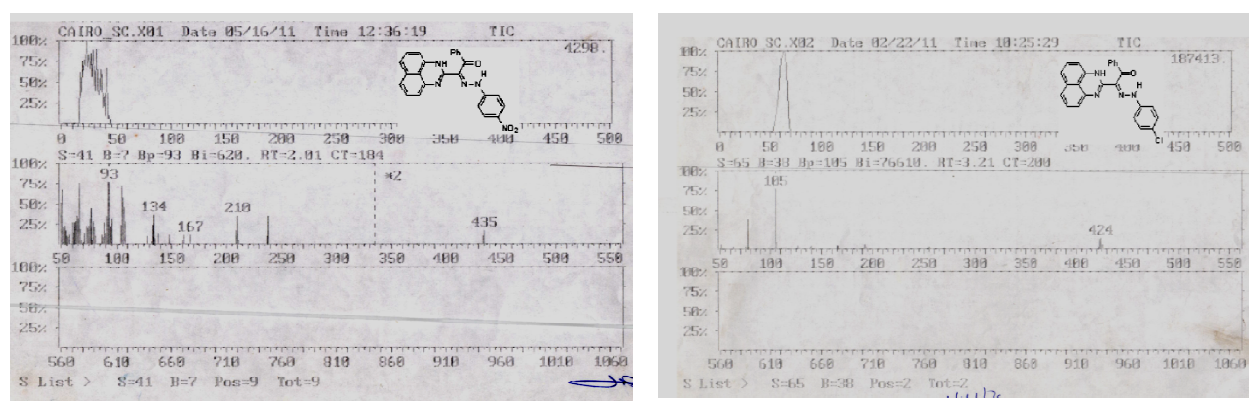

Fig. 2S. Mass spectra of LNO<sub>2</sub> and LCIP ligands

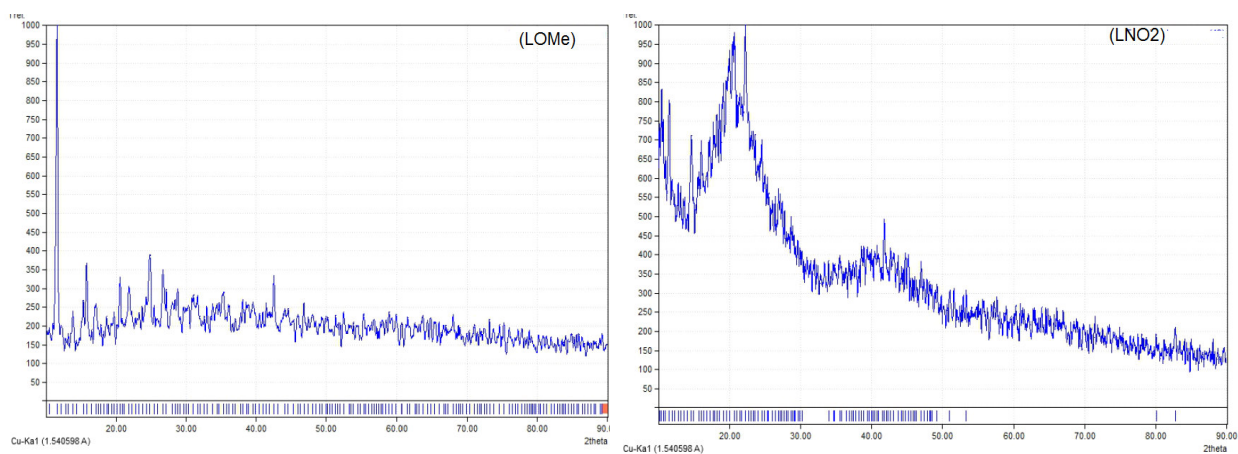

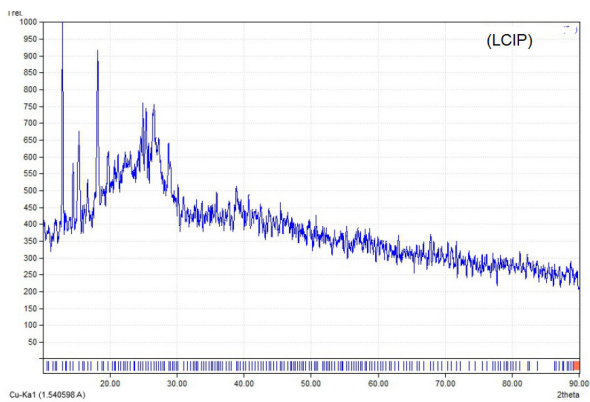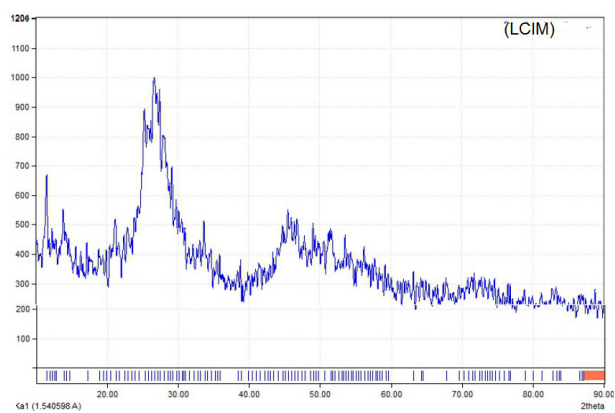

**Fig. 3 S.** X-Ray patterns for four perimidine ligands

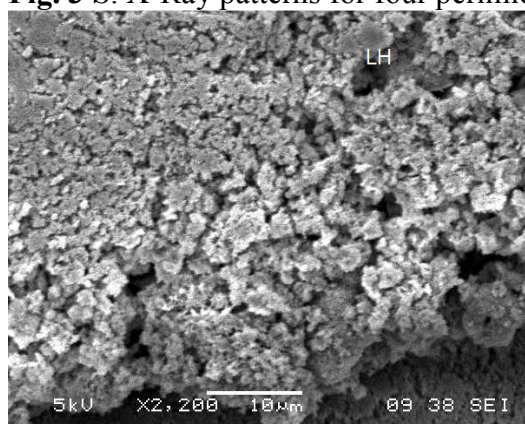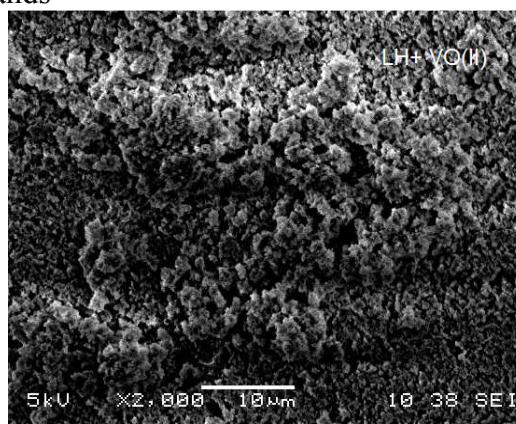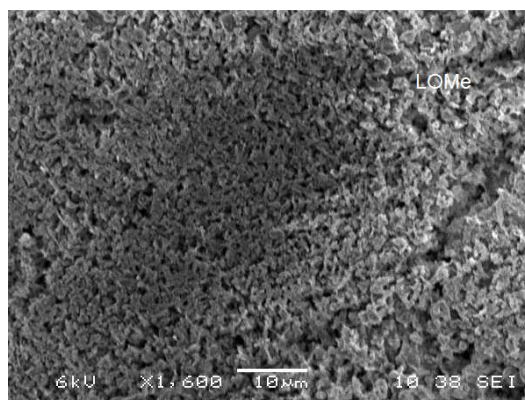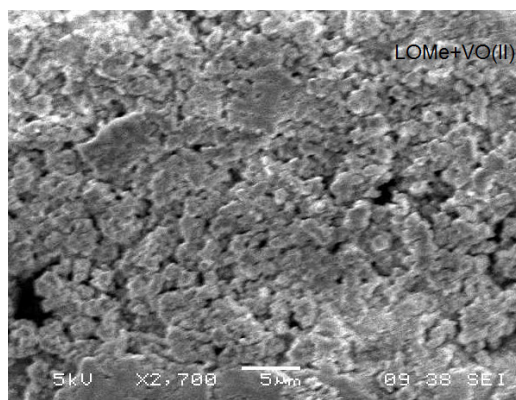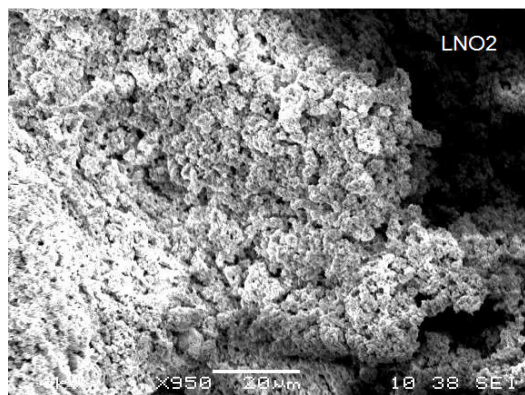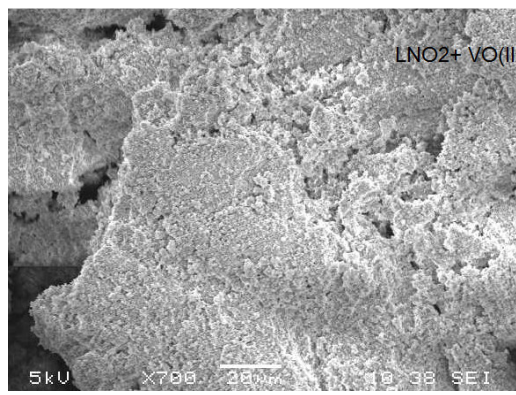

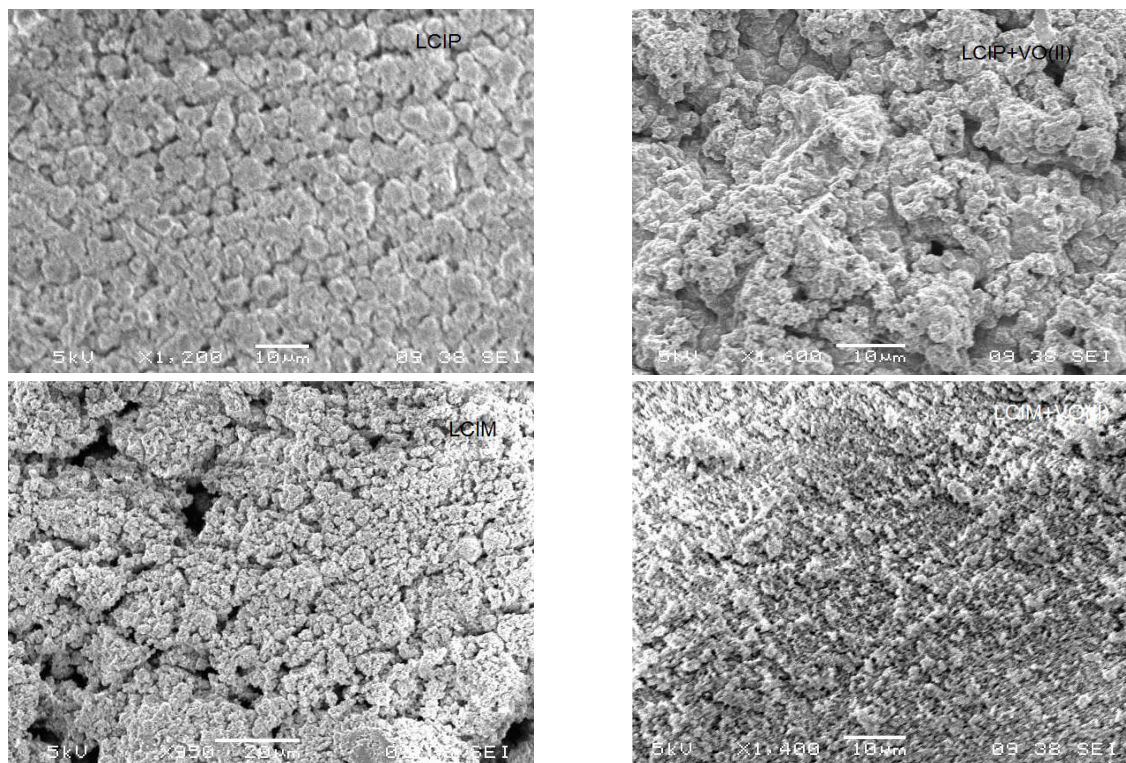

**Fig. 4S . SEM images of perimidine ligands and their VO(II) complexes**

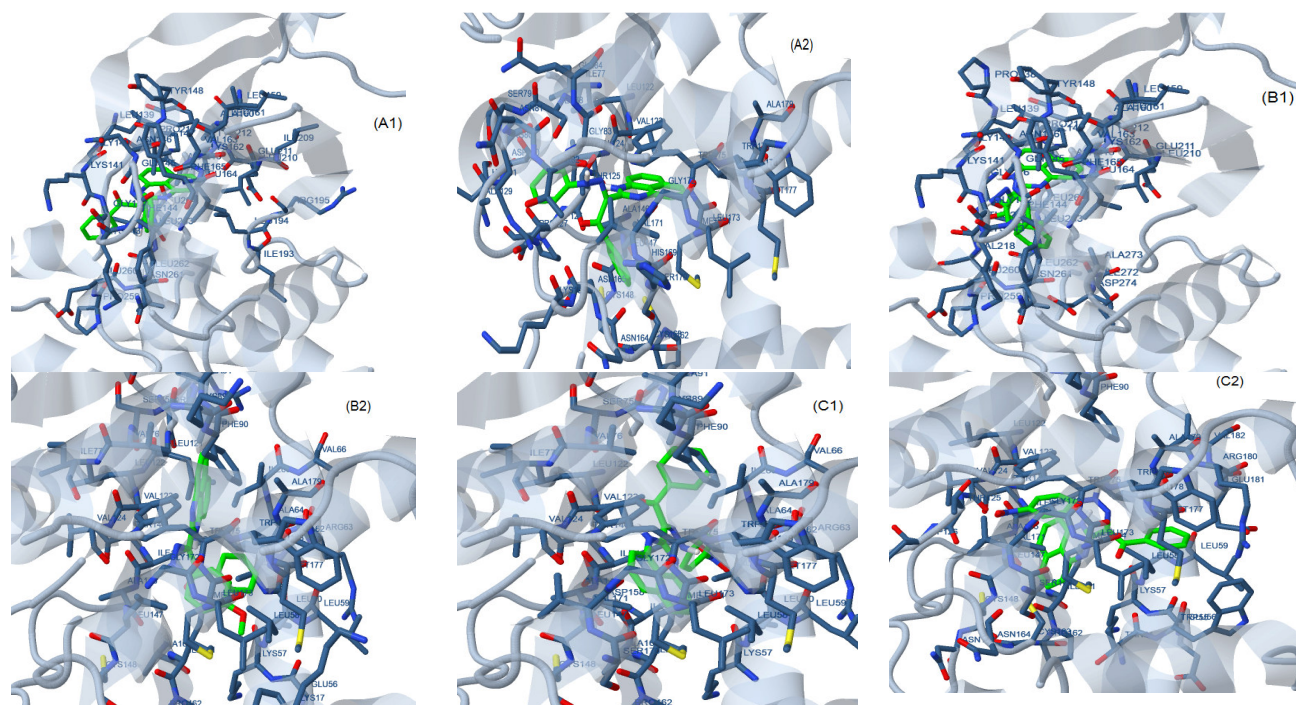



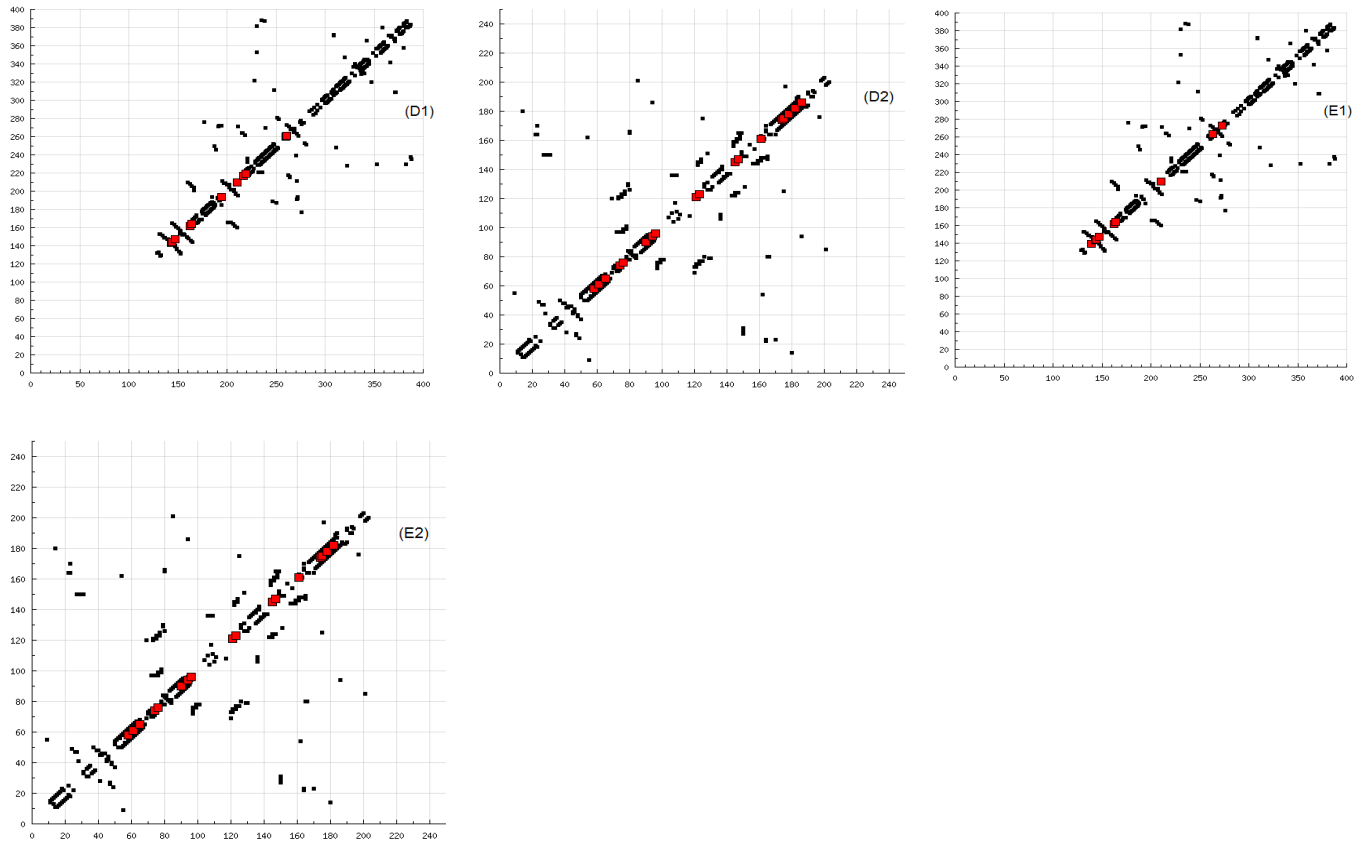

**Fig.6S** . Interacting hp plot ; LH, LOMe,LNO<sub>2</sub>,LCIPand LCIM with 4c3p(1) and 3bch(2) receptors(A-E, respectively)



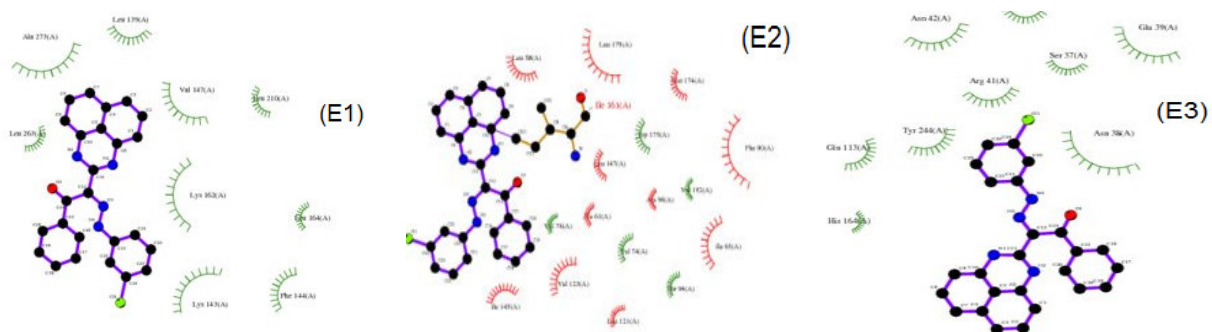

**Fig. 7S.** 2D plot forms ; LH, LOMe, LNO<sub>2</sub>, LCIP and LCIM with 4c3p (1), 3bch (2) and 4zdr (3) receptors (A-E, respectively)

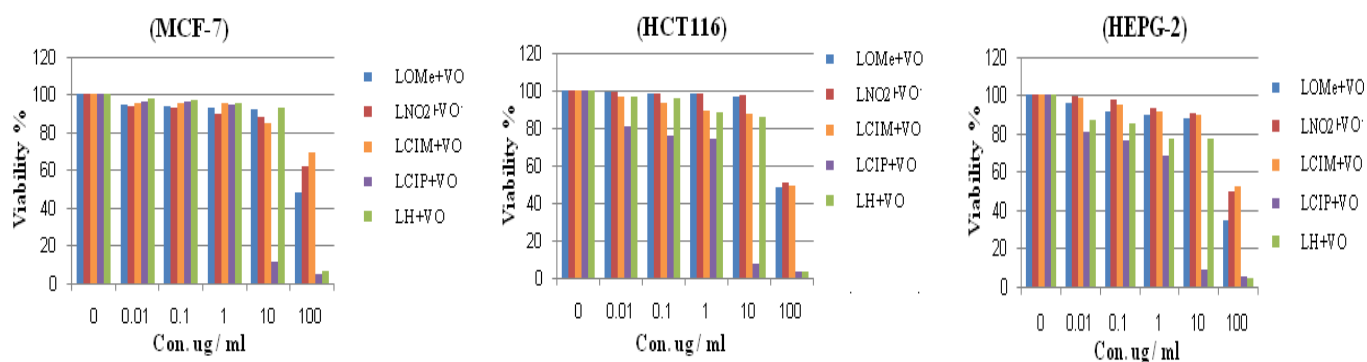

**Fig.8S .** Dose response curves of perimidinone-VO(II) complexes against MCF-7, HCT-116 and HEPG-2 cancer cells
